# Supplementary material for: Associations between ABO blood groups and pancreatic ductal adenocarcinoma: influence on resection status and survival
Source: PubMed Central journal article supplement (PMC5504338; doi:10.1002/cam4.1097), 2017-05-29

# Supplementary Figure 1

**A:** All cases - **Secretor** vs. **Non-secretor**

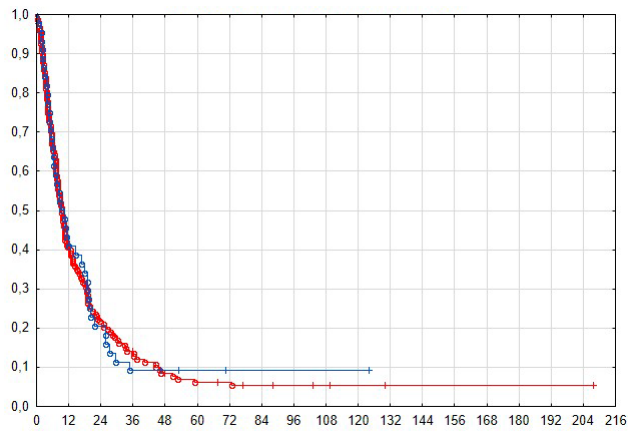

**B:** Resected cases - **Secretor** vs. **Non-secretor**

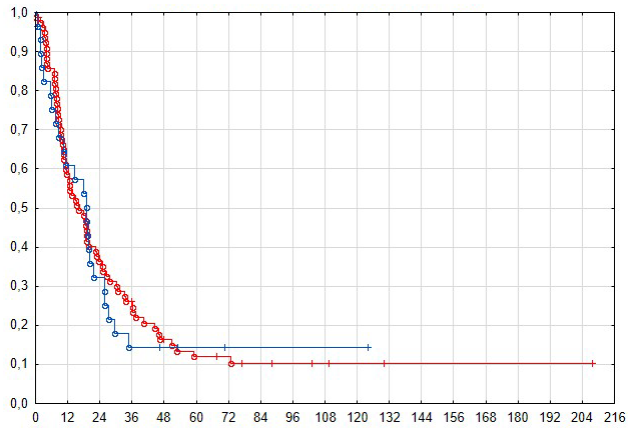

**C:** Unresected cases - **Secretor** vs. **Non-secretor**

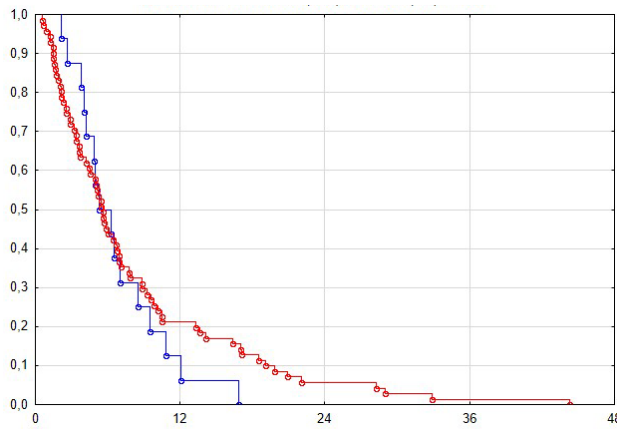

Supplement: CAM4-6-1531-s001.pdf [file CAM4-6-1531-s001.pdf]
