# Supplementary material for: Associations between ABO blood groups and pancreatic ductal adenocarcinoma: influence on resection status and survival
Source: PubMed Central journal article supplement (PMC5504338; doi:10.1002/cam4.1097), 2017-05-29
Supplement: CAM4-6-1531-s002.pdf [file CAM4-6-1531-s002.pdf]

**Supplementary Table 1.** SNPs used for *ABO* and *FUT2* allele genotyping

| Allele          | <i>ABO</i> SNPs |           |          | <i>FUT2</i> SNP |
|-----------------|-----------------|-----------|----------|-----------------|
|                 | rs8176704       | rs8176746 | rs505922 | rs601338        |
| A <sub>1</sub>  | G               | C         | C        | -               |
| A <sub>2</sub>  | A               | C         | C        | -               |
| B               | G               | A         | C        | -               |
| O               | G               | C         | T        | -               |
| Se              | -               | -         | -        | G               |
| Se <sup>0</sup> | -               | -         | -        | A               |

Se and Se<sup>0</sup> refer to secretor and non-secretor allele, respectively

**Supplementary Table 2.** *ABO* and *FUT2* genotype frequencies of blood donor controls and pancreatic cancer cases

| Genotype                        | Controls<br>( <i>n</i> =379) |      | All cases<br>( <i>n</i> =237) |      | PDAC cases only<br>( <i>n</i> =195) |      |
|---------------------------------|------------------------------|------|-------------------------------|------|-------------------------------------|------|
|                                 | <i>n</i>                     | %    | <i>n</i>                      | %    | <i>n</i>                            | %    |
| <b><i>ABO</i></b>               |                              |      |                               |      |                                     |      |
| A <sub>1</sub> A <sub>1</sub>   | 15                           | 4.0  | 6                             | 2.5  | 6                                   | 3.1  |
| A <sub>1</sub> A <sub>2</sub>   | 5                            | 1.3  | 14                            | 5.9  | 13                                  | 6.7  |
| A <sub>2</sub> A <sub>2</sub>   | 4                            | 1.1  | 0                             | 0.0  | 0                                   | 0.0  |
| A <sub>1</sub> O                | 91                           | 24.0 | 75                            | 31.6 | 64                                  | 32.8 |
| A <sub>2</sub> O                | 39                           | 10.3 | 20                            | 8.4  | 16                                  | 8.2  |
| BB                              | 3                            | 0.8  | 0                             | 0.0  | 0                                   | 0.0  |
| BO                              | 43                           | 11.3 | 29                            | 12.2 | 25                                  | 12.8 |
| A <sub>1</sub> B                | 10                           | 2.6  | 5                             | 2.1  | 4                                   | 2.1  |
| A <sub>2</sub> B                | 7                            | 1.8  | 2                             | 0.8  | 1                                   | 0.5  |
| OO                              | 162                          | 42.7 | 86                            | 36.3 | 66                                  | 33.8 |
| <b><i>FUT2</i></b>              |                              |      |                               |      |                                     |      |
| SeSe                            | 96                           | 25.3 | 64                            | 27.0 | 64                                  | 27.0 |
| SeSe <sup>0</sup>               | 198                          | 52.2 | 116                           | 48.9 | 116                                 | 48.9 |
| Se <sup>0</sup> Se <sup>0</sup> | 85                           | 22.4 | 57                            | 24.1 | 57                                  | 24.1 |
